# Supplementary material for: Cancer mortality in Common Mental Disorders: A 10-year retrospective cohort study
Source: Springer Nature journal article supplement (doi:10.1007/s00127-022-02376-x), 2022-11-17
Supplement: MOESM1 [file 127_2022_2376_MOESM1_ESM.pdf]

Title: Cancer mortality in Common Mental Disorders: A 10-year retrospective cohort study

Journal: Social Psychiatry and Psychiatric Epidemiology

Authors: Federico Chierzi; Elisa Stivanello; Muriel Assunta Musti; Vincenza Perlangeli; Paolo Marzaroli; Francesco De Rossi; Paolo Pandolfi; Alessio Saponaro; Luigi Grassi; Martino Belvederi Murri; Marco Menchetti; Angelo Fioritti; Domenico Berardi

Corresponding Author: Professor Marco Menchetti. [marco.menchetti3@unibo.it](mailto:marco.menchetti3@unibo.it). Department of Biomedical and Neuromotor Sciences, University of Bologna, Bologna Italy; Department of Mental Health and Substance Abuse, Local Health Trust of Bologna, Bologna Italy

**Table 1. ICD 9 CM for the classification of the diagnostic group**

| <i>Diagnostic Group</i>   | <i>ICD9-CM<sup>a</sup></i>                                                                |
|---------------------------|-------------------------------------------------------------------------------------------|
| <b>Depression</b>         | 296, 296.2*, 296.3*, 296.82, 296.9*, 298.0, 300.4, 309.0, 309.1, 309.1, 311               |
| <b>Neurotic disorders</b> | 300* (escl. 300.4), 306*, 307.4*, 307.8*, 307.9, 308*, 309.2* (escl. 309.28), 309.8*, 316 |

a. ICD: International Classification of Diseases

**Table 2. ICD-10 codes for causes of death; all neoplasm and site-specific malignant neoplasm.**

| <b>Causes of deaths</b>                                     | <b>ICD-10<sup>a</sup> codes</b> |
|-------------------------------------------------------------|---------------------------------|
| <b>All neoplasms</b>                                        | C. D1-D4                        |
| <b>Site specific malignant neoplasms</b>                    |                                 |
| oesophagus                                                  | C15                             |
| stomach                                                     | C16                             |
| colon, rectosigmoid junction, rectum, anus                  | C18-C21                         |
| liver, gallbladder, biliary tract                           | C22-C24                         |
| pancreas                                                    | C25                             |
| larynx                                                      | C32                             |
| trachea, bronchus and lung                                  | C33-C34                         |
| melanoma                                                    | C43                             |
| breast                                                      | C50                             |
| uterus (cervix, corpus, unspecified)                        | C53-C55                         |
| ovary and other female genital organs                       | C56-C57                         |
| prostate                                                    | C61                             |
| kidney, renal pelvis, ureter and unspecified urinary organs | C64-C66, C68                    |
| bladder                                                     | C67                             |
| meninges, brain and other parts of CNS                      | C70-C72                         |
| lymphoid, hematopoietic and related tissue                  | C81-C96                         |

a. ICD: International Classification of Diseases
